# Supplementary material for: Elevated growth and biomass along temperate forest edges
Source: PubMed Central journal article supplement (PMC8664805; doi:10.1038/s41467-021-27373-7), 2021-12-10
Supplement: 41467_2021_27373_MOESM1_ESM.pdf [file 41467_2021_27373_MOESM1_ESM.pdf]

**Supporting information for *Elevated growth and biomass along temperate forest edges***

Luca L. Morreale<sup>1,2,\*</sup>, Jonathan R. Thompson<sup>2</sup>, Xiaojing Tang<sup>1</sup>, Andrew B. Reinmann<sup>3,4,5</sup>, Lucy R. Hutyra<sup>1</sup>.

<sup>1</sup> Department of Earth & Environment, Boston University

<sup>2</sup> Harvard Forest, Harvard University

<sup>3</sup> Environmental Science Initiative, CUNY Advanced Science Research Center

<sup>4</sup> Graduate Program in Earth and Environmental Sciences and Biology, CUNY Graduate Center

<sup>5</sup> Department of Geography and Environmental Sciences, Hunter College

\* Corresponding Author; [lmorreale@bu.edu](mailto:lmorreale@bu.edu)

## Supplementary Figures

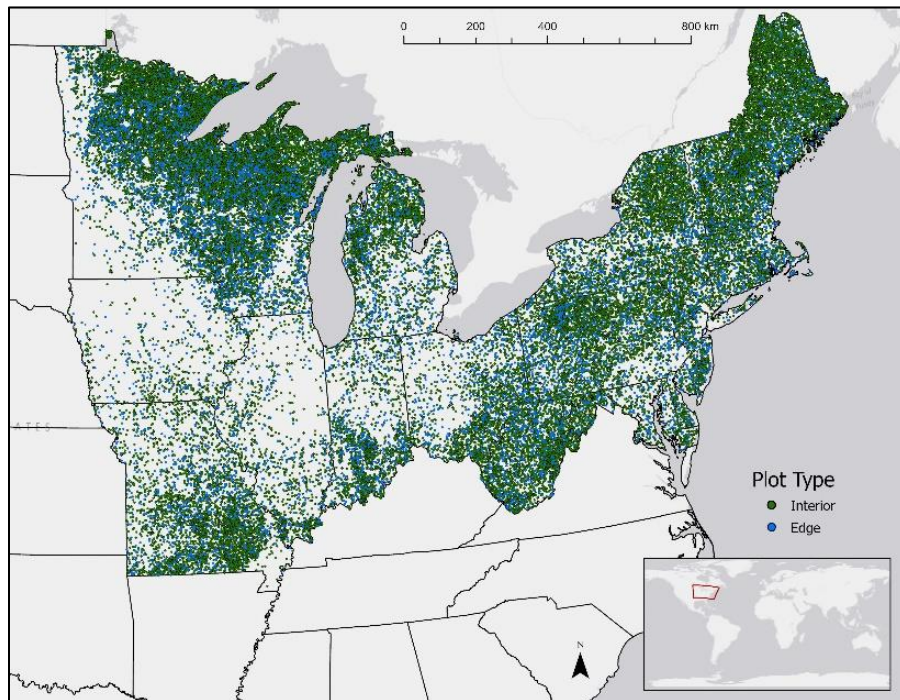

Supplementary Figure 1. Study region and approximate locations of edge and interior FIA plots.

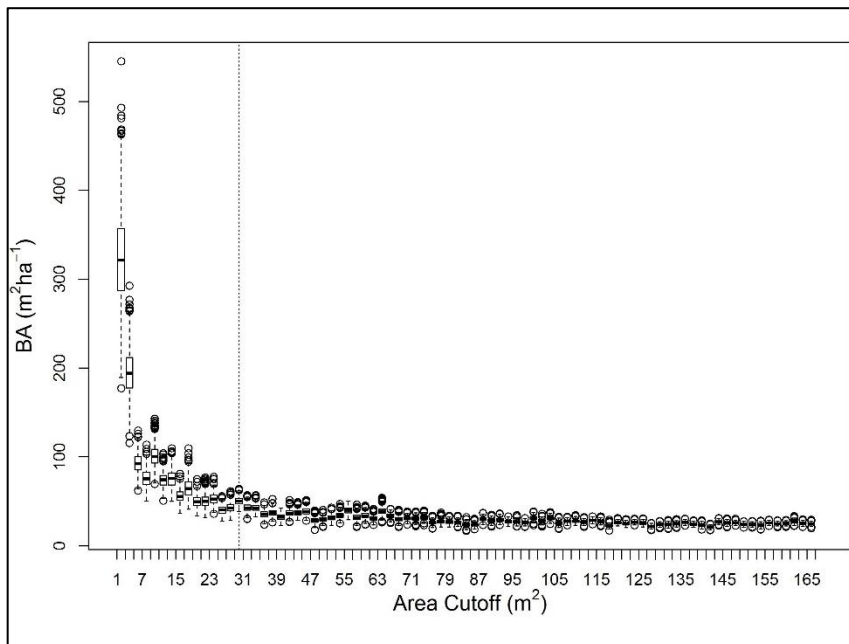

Supplementary Figure 2. Sensitivity of basal area estimates to subplot area. FIA plots with an area of  $<30m^2$  (vertical line) were excluded from this analysis due to small area biases.  $n = 10583$  forest subplots were used for this sensitivity analysis. Boxplots indicate median (center line), 25<sup>th</sup> and 75<sup>th</sup> percentile (box) 5<sup>th</sup> and 95<sup>th</sup> percentile (whiskers), and outliers (individual points).

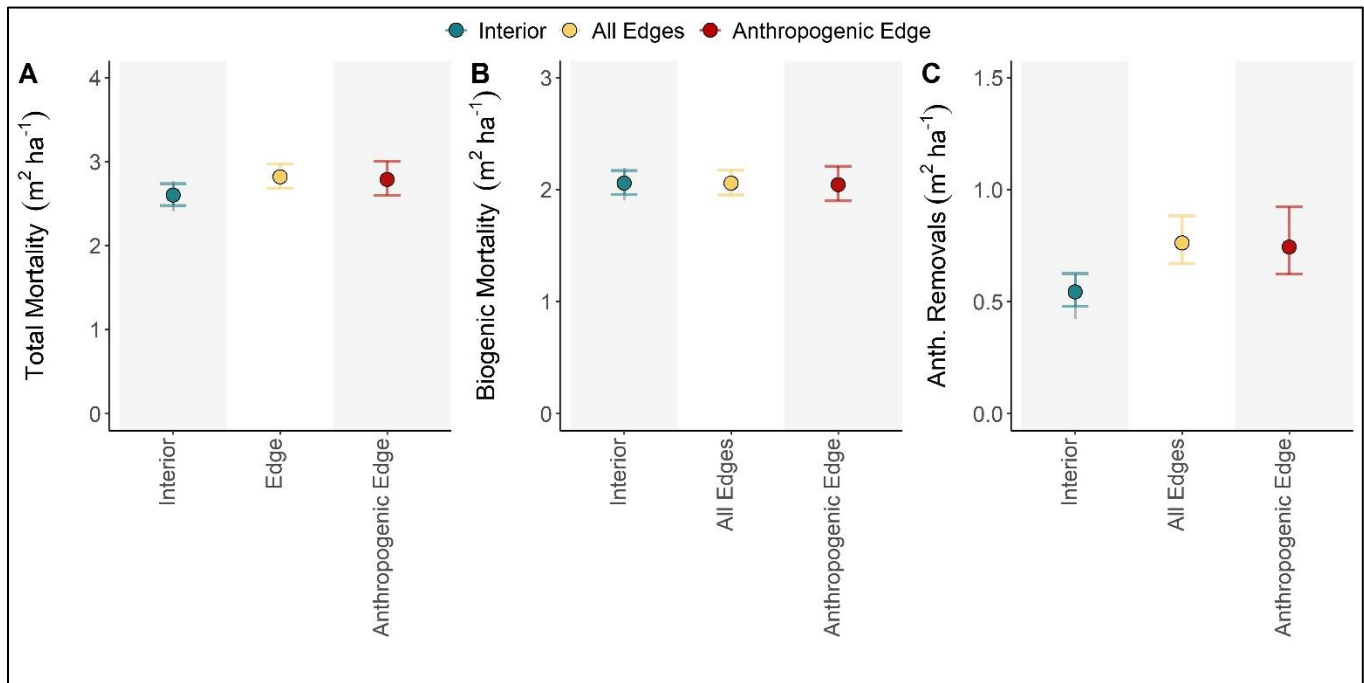

Supplementary Figure 3. Mortality differences between edge, interior, and anthropogenic edges. (A) Combined biogenic mortality and anthropogenic removals. (B) Mortality from biogenic causes, measured in BA of dead trees that remained on the subplot. (C) Mortality from anthropogenic cutting, measured in BA of trees that were cut and removed from the subplot. Error bars show 95% confidence intervals on mean marginal effects. Interior and All Edge groups have  $n = 6607$  independent subplots, Anthropogenic Edges have  $n = 4327$  independent subplots

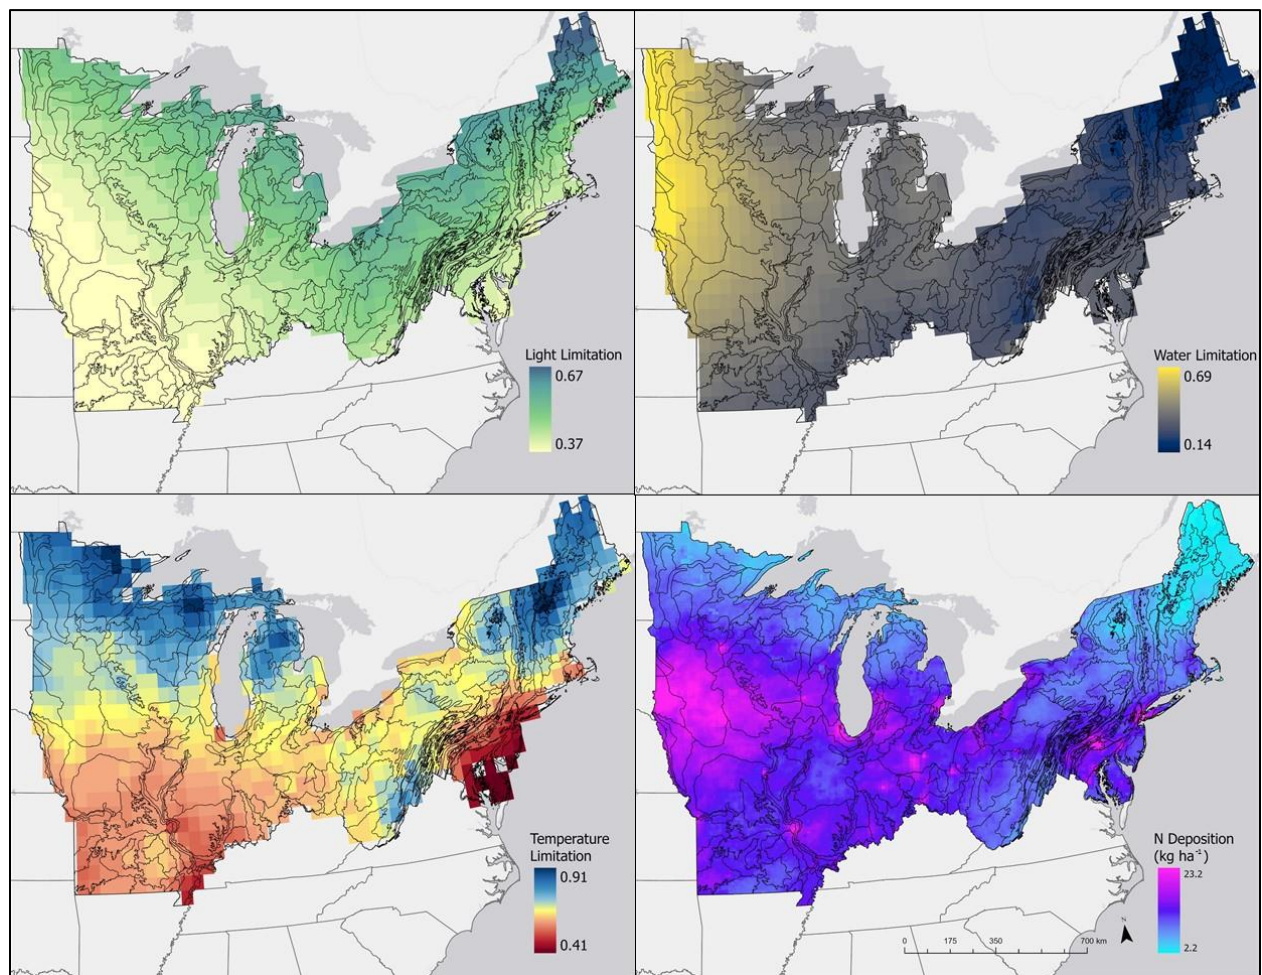

Supplementary Figure 4. Gridded abiotic predictors of forest productivity. (A) Light limitation on vegetation productivity, unit-index ranging from 0 to 1<sup>6</sup>. (B) Water limitation on vegetation productivity, unit-index ranging from 0 to 1<sup>6</sup>. (C) Temperature limitation on vegetation productivity, unit-index ranging from 0 to 1<sup>6</sup>. (D) Atmospheric nitrogen deposition in 2018, kg ha<sup>-1</sup><sup>7</sup>.

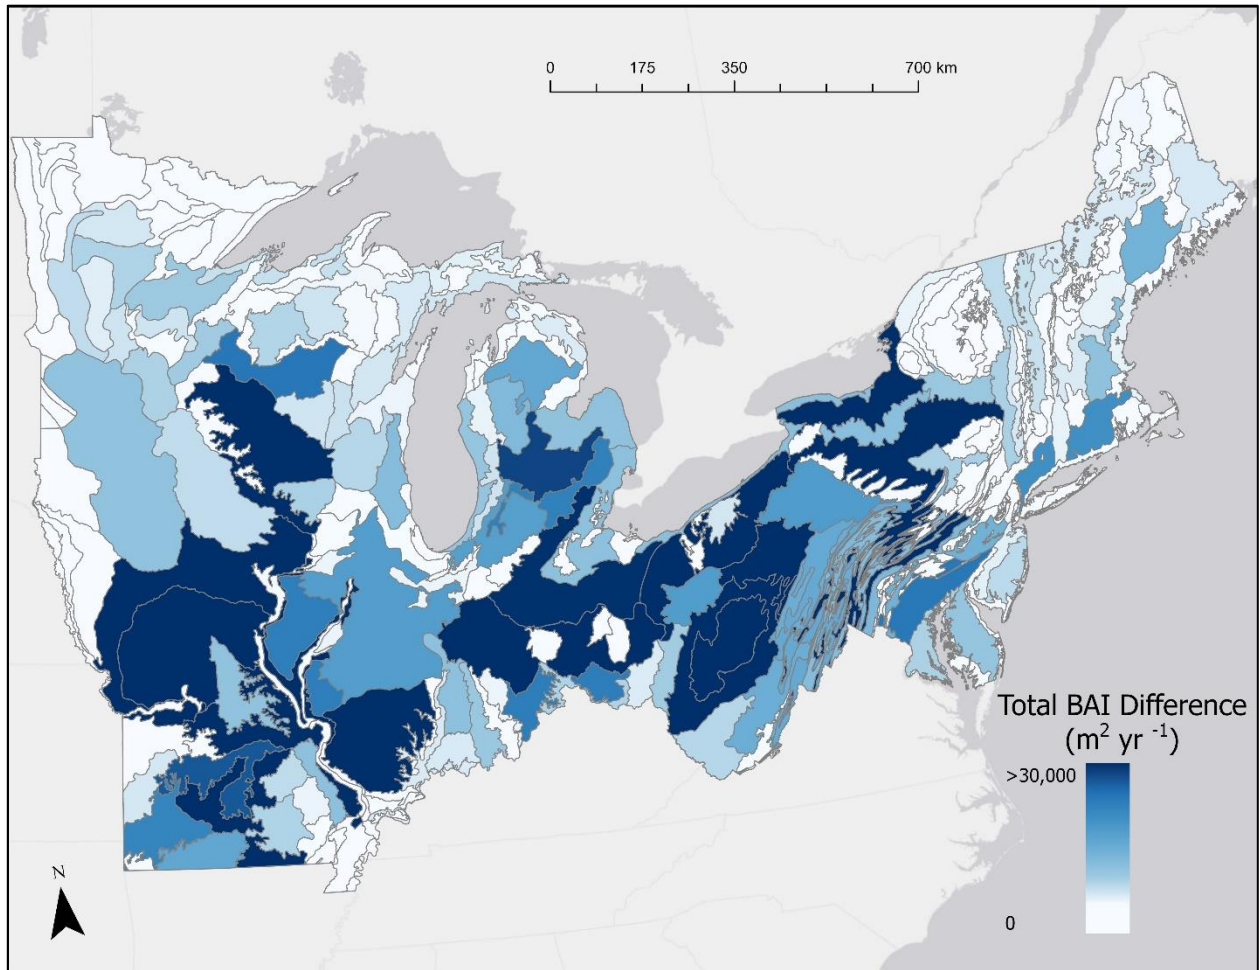

Supplementary Figure 5. Increases in total ecoregion BAI ( $\text{m}^2 \text{yr}^{-1}$ ) associated with elevated growth at the forest edge. BAI difference was calculated from individual ecoregion forest composition and forest edge area.

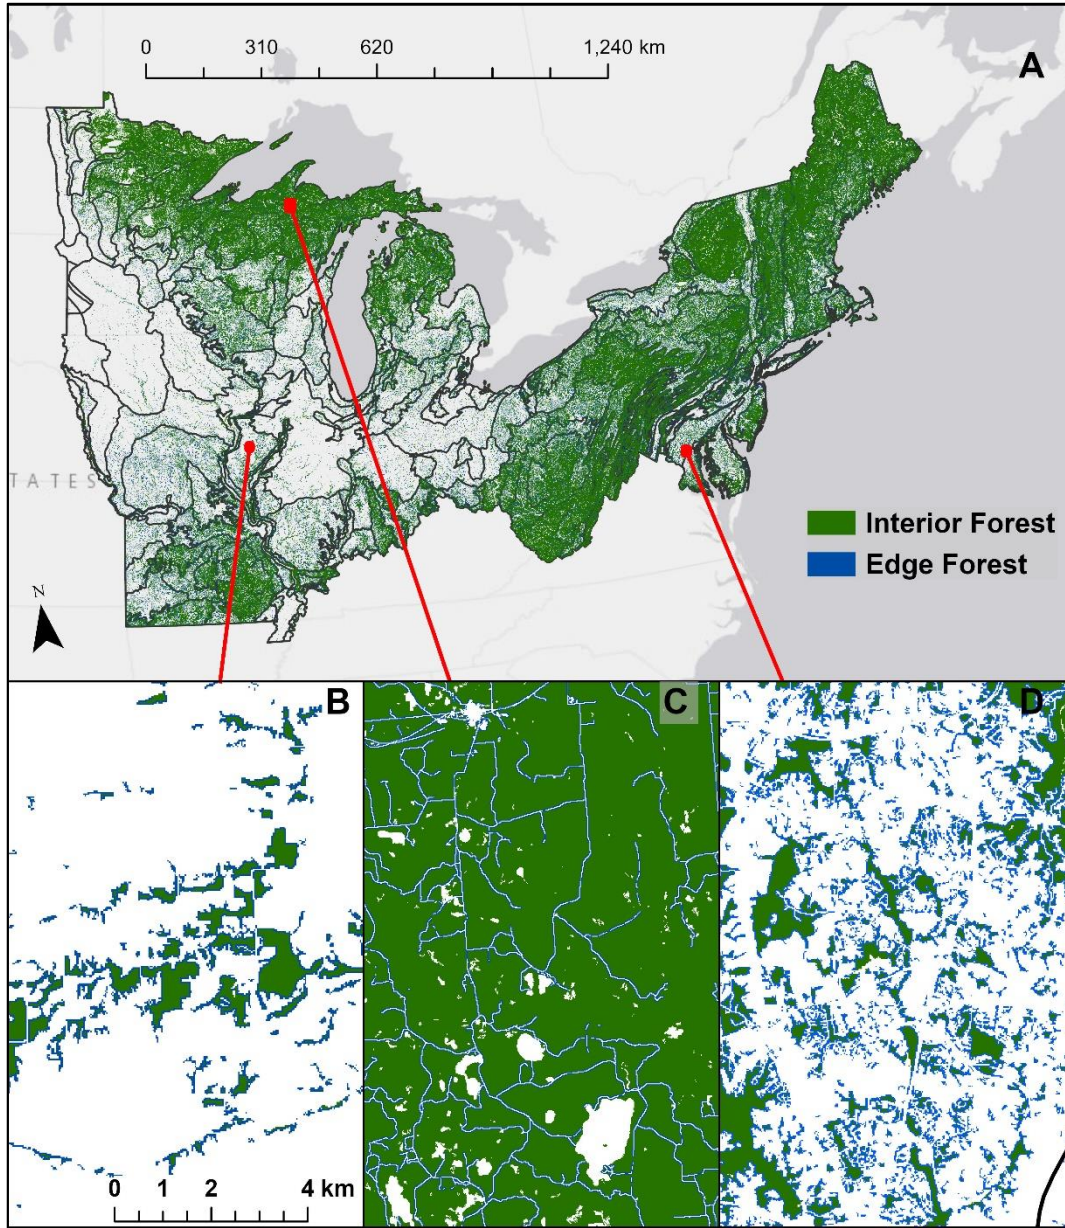

Supplementary Figure 6. (A) Edge and interior forest cover designated from the 2016 National Land Cover Database <sup>25</sup>. (B) Agricultural areas have a high proportion of edge forest (Illinois). (C) The northern areas in our study region have the smallest amount of fragmentation (Michigan). (D) The metropolitan east coast is both heavily fragmented and moderately forested (Maryland). EPA Level IV ecoregion boundaries are shown in black.

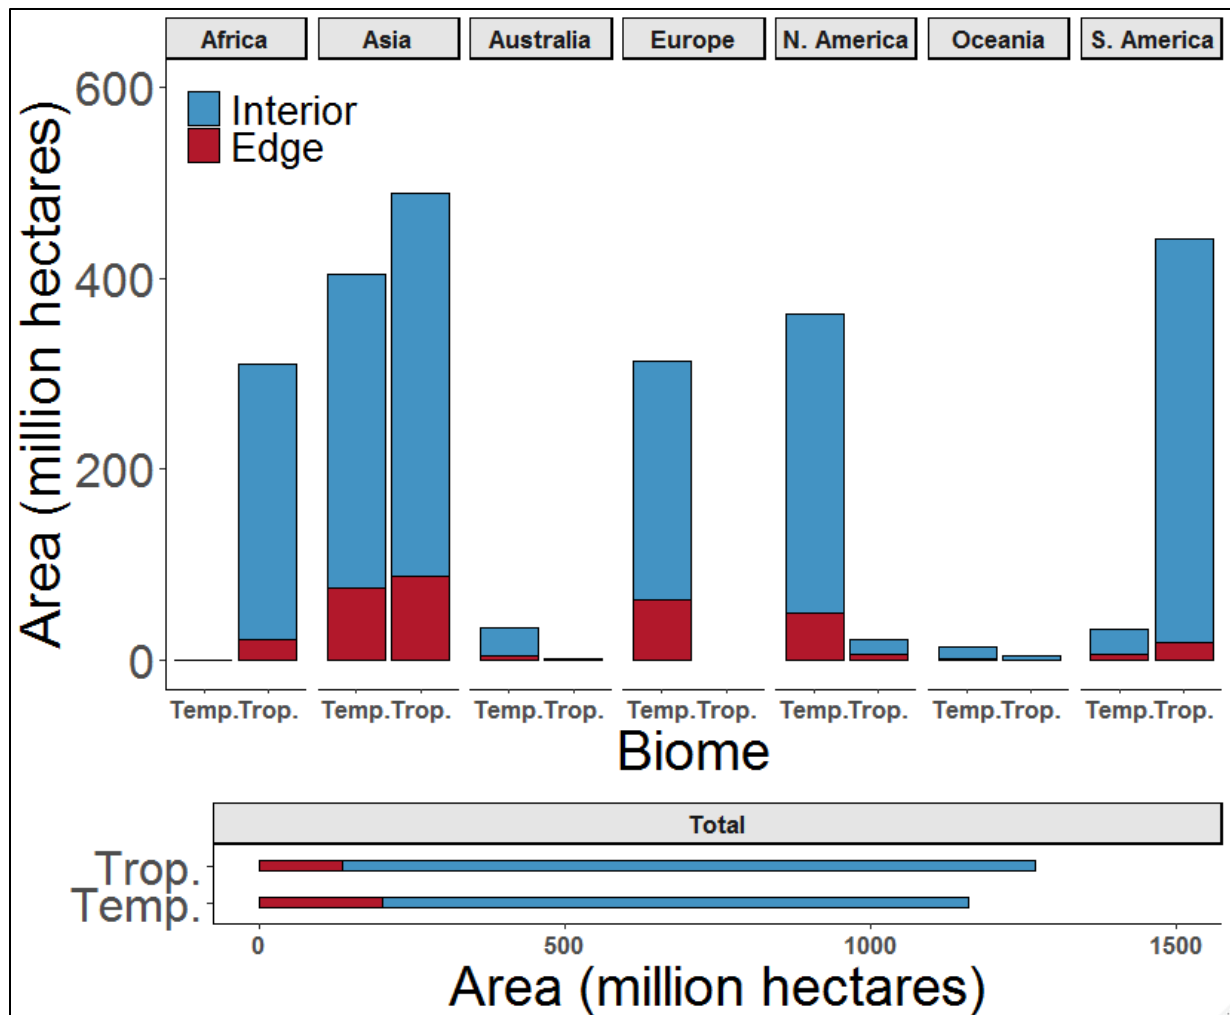

Supplementary Figure 7. Results from the robustness test of % forest cover threshold for estimates of temperate and tropical fragmentation using a 30% forest cover minimum definition of forest.

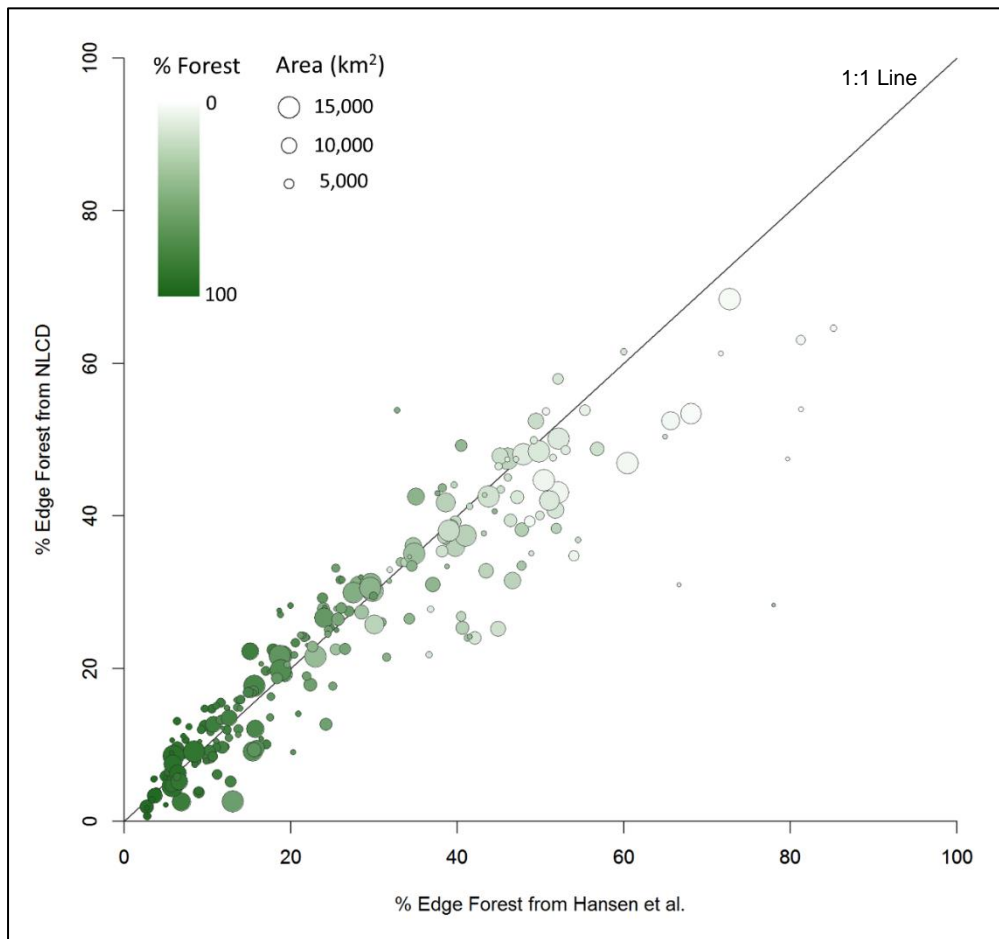

Supplementary Figure 8. Percent edge forest of 247 ecoregions located in the Northeast US derived from Hansen Global Forest Change (v1.7) 16 dataset versus from NLCD land cover map 13. Size of the points corresponds to the size of the ecoregions, color of the points corresponds to percent forest cover within each ecoregion.



Supplementary Tables

Supplementary Table 1. Definition of forest type groups with sample size used in final analyses.

| Forest Type Name         | FIA Forest Type Codes | N - All Edges | N -Anthropogenic Edges |
|--------------------------|-----------------------|---------------|------------------------|
| Northern Pines - Hemlock | 100 - 105             | 491           | 247                    |
| Spruce - Fir             | 120 - 129             | 402           | 98                     |
| Southern Conifers        | 140 - 391             | 123           | 75                     |
| Oak - Pine               | 400 - 409             | 248           | 156                    |
| Oak - Hickory            | 500 - 520             | 2551          | 1831                   |
| Bottomland Forests       | 600 - 709             | 693           | 329                    |
| Northern Hardwood        | 800 - 809             | 1229          | 773                    |
| Aspen - Birch            | 900 - 905             | 776           | 305                    |

Supplementary Table 2. Model forms and fits from GLMs with BA and BAI as response variables. dAIC is the difference in AIC relative to the best model within each model set. Pseudo R<sup>2</sup> = Nagelkerke pseudo R<sup>2</sup>, a goodness of fit metric calculated from model likelihood. Resid. Dev = Residual deviance, a generalization of residual sum of squares. Resid. Df = Residual degrees of freedom used in the calculation of residual deviance.

|               | Response Var. | Model Form                                                         | Pseudo R <sup>2</sup> | Resid. Dev    | Resid. DF    | AIC             | dAIC       |
|---------------|---------------|--------------------------------------------------------------------|-----------------------|---------------|--------------|-----------------|------------|
| All Edges     |               |                                                                    |                       |               |              |                 |            |
|               | <b>BA</b>     | <b>EdgeType * ForestType + Light + Water + Temperature + N.Dep</b> | <b>0.069</b>          | <b>6971.6</b> | <b>13652</b> | <b>109273.2</b> | <b>0.0</b> |
|               | BA            | EdgeType * ForestType + Water                                      | 0.067                 | 6986.6        | 13655        | 109299.0        | 25.7       |
|               | BA            | EdgeType * ForestType + Temperature                                | 0.060                 | 7034.7        | 13655        | 109400.8        | 127.5      |
|               | BA            | EdgeType * ForestType + Light                                      | 0.057                 | 7054.0        | 13655        | 109441.2        | 167.9      |
|               | BA            | EdgeType + ForestType                                              | 0.055                 | 7065.9        | 13664        | 109448.3        | 175.1      |
|               | BA            | EdgeType * ForestType + N.Dep                                      | 0.056                 | 7060.5        | 13655        | 109454.9        | 181.7      |
|               | BA            | EdgeType * ForestType                                              | 0.056                 | 7062.0        | 13656        | 109456.0        | 182.8      |
|               | BA            | ForestType                                                         | 0.047                 | 7123.3        | 13665        | 109566.2        | 293.0      |
|               | BA            | EdgeType                                                           | 0.008                 | 7386.7        | 13672        | 110091.4        | 818.2      |
| Anthro. Edges |               |                                                                    |                       |               |              |                 |            |
|               | <b>BA</b>     | <b>EdgeType * ForestType + Light + Water + Temperature + N.Dep</b> | <b>0.059</b>          | <b>4015.5</b> | <b>8088</b>  | <b>65637.3</b>  | <b>0.0</b> |
|               | BA            | EdgeType * ForestType + Water                                      | 0.058                 | 4022.8        | 8091         | 65647.2         | 10.0       |
|               | BA            | EdgeType * ForestType + Temperature                                | 0.053                 | 4041.7        | 8091         | 65688.3         | 51.1       |
|               | BA            | EdgeType * ForestType + Light                                      | 0.051                 | 4046.8        | 8091         | 65699.4         | 62.1       |
|               | BA            | EdgeType + ForestType                                              | 0.049                 | 4056.0        | 8100         | 65701.2         | 64.0       |
|               | BA            | EdgeType * ForestType + N.Dep                                      | 0.051                 | 4049.8        | 8091         | 65705.9         | 68.6       |

|               |            |                                                                    |              |               |              |               |            |
|---------------|------------|--------------------------------------------------------------------|--------------|---------------|--------------|---------------|------------|
|               | BA         | EdgeType * ForestType                                              | 0.050        | 4051.2        | 8092         | 65706.8       | 69.6       |
|               | BA         | ForestType                                                         | 0.031        | 4128.3        | 8101         | 65854.4       | 217.2      |
|               | BA         | EdgeType                                                           | 0.019        | 4175.1        | 8108         | 65939.3       | 302.1      |
| All Edges     |            |                                                                    |              |               |              |               |            |
|               | <b>BAI</b> | <b>EdgeType * ForestType + Light + Water + Temperature + N.Dep</b> | <b>0.153</b> | <b>6977.2</b> | <b>13652</b> | <b>7718.4</b> | <b>0.0</b> |
|               | BAI        | EdgeType * ForestType + Temperature                                | 0.122        | 7075.9        | 13655        | 7920.5        | 202.1      |
|               | BAI        | EdgeType * ForestType + Water                                      | 0.121        | 7082.0        | 13655        | 7933.1        | 214.7      |
|               | BAI        | EdgeType * ForestType + N.Dep                                      | 0.118        | 7091.1        | 13655        | 7952.3        | 234.0      |
|               | BAI        | EdgeType * ForestType + Light                                      | 0.107        | 7126.9        | 13655        | 8027.0        | 308.6      |
|               | BAI        | EdgeType * ForestType                                              | 0.106        | 7129.9        | 13656        | 8031.1        | 312.7      |
|               | BAI        | EdgeType + ForestType                                              | 0.102        | 7142.4        | 13664        | 8041.2        | 322.8      |
|               | BAI        | ForestType                                                         | 0.053        | 7301.4        | 13665        | 8366.1        | 647.7      |
|               | BAI        | EdgeType                                                           | 0.049        | 7313.1        | 13672        | 8375.9        | 657.6      |
| Anthro. Edges |            |                                                                    |              |               |              |               |            |
|               | <b>BAI</b> | <b>EdgeType * ForestType + Light + Water + Temperature + N.Dep</b> | <b>0.149</b> | <b>3792.7</b> | <b>8088</b>  | <b>5409.1</b> | <b>0.0</b> |
|               | BAI        | EdgeType * ForestType + N.Dep                                      | 0.131        | 3827.5        | 8091         | 5483.0        | 74.0       |
|               | BAI        | EdgeType * ForestType + Temperature                                | 0.130        | 3830.6        | 8091         | 5490.0        | 80.9       |
|               | BAI        | EdgeType * ForestType + Water                                      | 0.128        | 3833.4        | 8091         | 5496.4        | 87.3       |
|               | BAI        | EdgeType * ForestType + Light                                      | 0.126        | 3838.0        | 8091         | 5506.9        | 97.8       |
|               | BAI        | EdgeType * ForestType                                              | 0.124        | 3841.7        | 8092         | 5513.2        | 104.1      |
|               | BAI        | EdgeType + ForestType                                              | 0.118        | 3853.5        | 8100         | 5524.1        | 115.0      |
|               | BAI        | EdgeType                                                           | 0.098        | 3894.8        | 8108         | 5601.2        | 192.2      |
|               | BAI        | ForestType                                                         | 0.022        | 4046.1        | 8101         | 5949.1        | 540.0      |

Supplementary Table 3. Predicted mean marginal effects for each forest type and edge group. Upper and lower 95% confidence intervals in parentheses. Marginal effects were calculated with other predictors held at their within-forest type means. All reported values are in the units of BAI and BA ( $\text{m}^2 \text{ha}^{-1} \text{yr}^{-1}$  and  $\text{m}^2 \text{ha}^{-1}$ , respectively).

| Unit | Forest Type   | Edge Type          | Predicted        |
|------|---------------|--------------------|------------------|
| BAI  | All Forests   | Interior           | 0.51 (0.5-0.51)  |
| BAI  | All Forests   | Edge               | 0.63 (0.62-0.64) |
| BAI  | All Forests   | Anthropogenic Edge | 0.71 (0.7-0.72)  |
| BAI  | Aspen - Birch | All Edges          | 0.5 (0.48-0.53)  |

|     |                          |                    |                     |
|-----|--------------------------|--------------------|---------------------|
| BAI | Aspen - Birch            | Interior           | 0.46 (0.44-0.48)    |
| BAI | Aspen - Birch            | Anthropogenic Edge | 0.62 (0.58-0.66)    |
| BAI | Bottomland Forests       | All Edges          | 0.62 (0.59-0.65)    |
| BAI | Bottomland Forests       | Interior           | 0.52 (0.49-0.54)    |
| BAI | Bottomland Forests       | Anthropogenic Edge | 0.7 (0.66-0.75)     |
| BAI | Northern Hardwood        | All Edges          | 0.64 (0.61-0.66)    |
| BAI | Northern Hardwood        | Interior           | 0.52 (0.5-0.53)     |
| BAI | Northern Hardwood        | Anthropogenic Edge | 0.69 (0.66-0.72)    |
| BAI | Northern Pines - Hemlock | All Edges          | 0.72 (0.68-0.76)    |
| BAI | Northern Pines - Hemlock | Interior           | 0.62 (0.59-0.65)    |
| BAI | Northern Pines - Hemlock | Anthropogenic Edge | 0.78 (0.73-0.84)    |
| BAI | Oak - Hickory            | All Edges          | 0.65 (0.64-0.67)    |
| BAI | Oak - Hickory            | Interior           | 0.5 (0.49-0.51)     |
| BAI | Oak - Hickory            | Anthropogenic Edge | 0.7 (0.68-0.72)     |
| BAI | Oak - Pine               | All Edges          | 0.7 (0.65-0.76)     |
| BAI | Oak - Pine               | Interior           | 0.53 (0.49-0.57)    |
| BAI | Oak - Pine               | Anthropogenic Edge | 0.77 (0.71-0.85)    |
| BAI | Southern Conifers        | All Edges          | 0.66 (0.59-0.74)    |
| BAI | Southern Conifers        | Interior           | 0.55 (0.5-0.62)     |
| BAI | Southern Conifers        | Anthropogenic Edge | 0.67 (0.59-0.77)    |
| BAI | Spruce - Fir             | All Edges          | 0.44 (0.42-0.47)    |
| BAI | Spruce - Fir             | Interior           | 0.37 (0.35-0.4)     |
| BAI | Spruce - Fir             | Anthropogenic Edge | 0.6 (0.54-0.68)     |
| BA  | All Forests              | Interior           | 21.69 (21.35-22.05) |
| BA  | All Forests              | Edge               | 24.71 (24.3-25.13)  |
| BA  | All Forests              | Anthropogenic Edge | 26.93 (26.37-27.51) |
| BA  | Aspen - Birch            | Edge               | 16.86 (16.1-17.7)   |
| BA  | Aspen - Birch            | Interior           | 16.02 (15.31-16.8)  |
| BA  | Aspen - Birch            | Anthropogenic Edge | 19.75 (18.41-21.31) |
| BA  | Bottomland Forests       | Edge               | 22.56 (21.49-23.74) |
| BA  | Bottomland Forests       | Interior           | 20.1 (19.18-21.11)  |
| BA  | Bottomland Forests       | Anthropogenic Edge | 23.14 (21.62-24.89) |
| BA  | Northern Hardwood        | Edge               | 26.95 (25.98-28)    |
| BA  | Northern Hardwood        | Interior           | 23.27 (22.46-24.14) |
| BA  | Northern Hardwood        | Anthropogenic Edge | 27.97 (26.74-29.32) |
| BA  | Northern Pines - Hemlock | Edge               | 31.8 (30.04-33.77)  |
| BA  | Northern Pines - Hemlock | Interior           | 27.64 (26.14-29.34) |
| BA  | Northern Pines - Hemlock | Anthropogenic Edge | 34.29 (31.74-37.29) |
| BA  | Oak - Hickory            | Edge               | 25.69 (25.04-26.37) |
| BA  | Oak - Hickory            | Interior           | 22.08 (21.54-22.65) |
| BA  | Oak - Hickory            | Anthropogenic Edge | 26.67 (25.89-27.5)  |

|    |                   |                    |                     |
|----|-------------------|--------------------|---------------------|
| BA | Oak - Pine        | Edge               | 26.69 (24.64-29.1)  |
| BA | Oak - Pine        | Interior           | 22.54 (20.83-24.55) |
| BA | Oak - Pine        | Anthropogenic Edge | 29.38 (26.67-32.71) |
| BA | Southern Conifers | Edge               | 25.65 (22.94-29.09) |
| BA | Southern Conifers | Interior           | 21.93 (19.75-24.65) |
| BA | Southern Conifers | Anthropogenic Edge | 25.94 (22.58-30.48) |
| BA | Spruce - Fir      | Edge               | 19.14 (17.97-20.47) |
| BA | Spruce - Fir      | Interior           | 19.11 (17.96-20.41) |
| BA | Spruce - Fir      | Anthropogenic Edge | 22.35 (19.87-25.55) |

Supplementary Table 4. Pre- and post-matching covariate distributions for all edges. Mean Edge and Mean Control show the average value of each predictor within Edge and Interior groups, respectively, before and after the matching process. Std. mean difference shows the difference in means.

| Continuous Variables                   |        | Mean Edge | Mean Control | SD Control | Std mean difference | eCDF Median | eCDF Mean | eCDF max |
|----------------------------------------|--------|-----------|--------------|------------|---------------------|-------------|-----------|----------|
| <b>N. Deposition (kg ha-1)</b>         | Before | 9.08      | 8.15         | 2.58       | 0.37                | 0.12        | 0.10      | 0.13     |
|                                        | After  | 9.08      | 9.06         | 2.49       | 0.01                | 0.00        | 0.00      | 0.01     |
| <b>Light</b>                           | Before | 0.47      | 0.49         | 0.06       | -0.28               | 0.03        | 0.05      | 0.12     |
|                                        | After  | 0.47      | 0.47         | 0.05       | 0.00                | 0.00        | 0.00      | 0.00     |
| <b>Water</b>                           | Before | 0.38      | 0.35         | 0.11       | 0.30                | 0.05        | 0.05      | 0.12     |
|                                        | After  | 0.38      | 0.38         | 0.10       | 0.00                | 0.00        | 0.00      | 0.00     |
| <b>Temperature</b>                     | Before | 0.68      | 0.70         | 0.09       | -0.21               | 0.02        | 0.04      | 0.10     |
|                                        | After  | 0.68      | 0.68         | 0.09       | 0.00                | 0.00        | 0.00      | 0.00     |
| <b>Forest Types</b>                    |        |           |              |            |                     |             |           |          |
| <b>Northern Hardwood</b>               | Before | 0.18      | 0.27         | 0.45       | -0.23               | 0.04        | 0.04      | 0.09     |
|                                        | After  | 0.18      | 0.18         | 0.39       | 0.00                | 0.00        | 0.00      | 0.00     |
| <b>Northern Pines - Hemlock</b>        | Before | 0.07      | 0.06         | 0.23       | 0.04                | 0.01        | 0.01      | 0.01     |
|                                        | After  | 0.07      | 0.07         | 0.25       | 0.00                | 0.00        | 0.00      | 0.00     |
| <b>Oak - Hickory</b>                   | Before | 0.39      | 0.33         | 0.47       | 0.12                | 0.03        | 0.03      | 0.06     |
|                                        | After  | 0.39      | 0.39         | 0.49       | 0.00                | 0.00        | 0.00      | 0.00     |
| <b>Oak - Pine</b>                      | Before | 0.04      | 0.03         | 0.18       | 0.01                | 0.00        | 0.00      | 0.00     |
|                                        | After  | 0.04      | 0.04         | 0.19       | 0.00                | 0.00        | 0.00      | 0.00     |
| <b>Southern Pines - Other Conifers</b> | Before | 0.02      | 0.02         | 0.13       | 0.04                | 0.00        | 0.00      | 0.01     |
|                                        | After  | 0.02      | 0.02         | 0.14       | 0.00                | 0.00        | 0.00      | 0.00     |
| <b>Spruce - Fir</b>                    | Before | 0.06      | 0.11         | 0.31       | -0.21               | 0.02        | 0.02      | 0.05     |
|                                        | After  | 0.06      | 0.06         | 0.23       | 0.00                | 0.00        | 0.00      | 0.00     |

|                           |        |      |      |      |      |      |      |      |
|---------------------------|--------|------|------|------|------|------|------|------|
| <b>Bottomland Forests</b> | Before | 0.11 | 0.07 | 0.25 | 0.14 | 0.02 | 0.02 | 0.04 |
|                           | After  | 0.11 | 0.11 | 0.31 | 0.00 | 0.00 | 0.00 | 0.00 |

Supplementary Table 5. Pre- and post-matching covariate distributions for anthropogenic edges. Mean Edge and Mean Control show the average value of each predictor within Edge and Interior groups, respectively, before and after the matching process. Std. mean difference shows the difference in means.

| <b>Continuous Variables</b>            |        | <b>Mean Edge</b> | <b>Mean Control</b> | <b>SD Control</b> | <b>Std mean difference</b> | <b>eCDF Median</b> | <b>eCDF Mean</b> | <b>eCDF max</b> |
|----------------------------------------|--------|------------------|---------------------|-------------------|----------------------------|--------------------|------------------|-----------------|
| <b>N. Deposition (kg ha-1)</b>         | Before | 9.48             | 8.15                | 2.58              | 0.53                       | 0.16               | 0.15             | 0.22            |
|                                        | After  | 9.48             | 9.47                | 2.50              | 0.01                       | 0.00               | 0.00             | 0.01            |
| <b>Light</b>                           | Before | 0.47             | 0.49                | 0.06              | -0.38                      | 0.04               | 0.06             | 0.16            |
|                                        | After  | 0.47             | 0.47                | 0.05              | 0.00                       | 0.00               | 0.00             | 0.00            |
| <b>Water</b>                           | Before | 0.37             | 0.35                | 0.11              | 0.20                       | 0.03               | 0.03             | 0.10            |
|                                        | After  | 0.37             | 0.37                | 0.10              | 0.00                       | 0.00               | 0.00             | 0.00            |
| <b>Temperature</b>                     | Before | 0.66             | 0.70                | 0.09              | -0.49                      | 0.04               | 0.08             | 0.22            |
|                                        | After  | 0.66             | 0.66                | 0.08              | -0.01                      | 0.00               | 0.00             | 0.00            |
| <b>Forest Types</b>                    |        |                  |                     |                   |                            |                    |                  |                 |
| <b>Northern Hardwood</b>               | Before | 0.20             | 0.27                | 0.45              | -0.19                      | 0.04               | 0.04             | 0.07            |
|                                        | After  | 0.20             | 0.20                | 0.40              | 0.00                       | 0.00               | 0.00             | 0.00            |
| <b>Northern Pines - Hemlock</b>        | Before | 0.06             | 0.06                | 0.23              | 0.00                       | 0.00               | 0.00             | 0.00            |
|                                        | After  | 0.06             | 0.06                | 0.24              | 0.00                       | 0.00               | 0.00             | 0.00            |
| <b>Oak - Hickory</b>                   | Before | 0.47             | 0.33                | 0.47              | 0.28                       | 0.07               | 0.07             | 0.14            |
|                                        | After  | 0.47             | 0.47                | 0.50              | 0.00                       | 0.00               | 0.00             | 0.00            |
| <b>Oak - Pine</b>                      | Before | 0.04             | 0.03                | 0.18              | 0.02                       | 0.00               | 0.00             | 0.00            |
|                                        | After  | 0.04             | 0.04                | 0.19              | 0.00                       | 0.00               | 0.00             | 0.00            |
| <b>Southern Pines - Other Conifers</b> | Before | 0.02             | 0.02                | 0.13              | 0.04                       | 0.00               | 0.00             | 0.01            |
|                                        | After  | 0.02             | 0.02                | 0.15              | 0.00                       | 0.00               | 0.00             | 0.00            |
| <b>Spruce - Fir</b>                    | Before | 0.02             | 0.11                | 0.31              | -0.54                      | 0.04               | 0.04             | 0.08            |
|                                        | After  | 0.02             | 0.02                | 0.15              | 0.00                       | 0.00               | 0.00             | 0.00            |
| <b>Bottomland Forests</b>              | Before | 0.10             | 0.07                | 0.25              | 0.09                       | 0.01               | 0.01             | 0.03            |
|                                        | After  | 0.10             | 0.10                | 0.29              | 0.00                       | 0.00               | 0.00             | 0.00            |
